# Supplementary material
Source: HighWire-hosted journal article supplement (http://www.ajevonline.org/highwire/filestream/9344/field_highwire_adjunct_files/0/09-00028-SuppData.pdf)
Supplement: 09-00028-SuppData.pdf [file 09-00028-SuppData.pdf]

**Supplemental Table 1** Location of wild accessions analyzed in this study.

| Code | Location       | Latitude (°N) | Longitude (°W) | Height (m) | Observations        |
|------|----------------|---------------|----------------|------------|---------------------|
| ZA   | Zaouia Ahansal | 32.0589       | 6.0987         | 1235       | Isolated population |
| CB   | Chabet-el-Btom | 33.1625       | 6.8929         | 660        | Isolated population |
| OU   | Ouaoumana      | 32.6983       | 5.8425         | 715        | Farmed land         |
| OM   | Oum-er-Rbia    | 33.0565       | 5.4160         | 1250       | Inhabited area      |
| EK   | El-Ksiba       | 32.5821       | 6.0510         | 750        | Inhabited area      |
| LO   | L'Ourika       | 31.3687       | 7.7927         | 900        | Farmed land         |
| SF   | Setti-Fatma    | 31.2278       | 7.6724         | 1430       | Inhabited area      |
| AT   | Arba-Talatast  | 31.4153       | 7.5334         | 1080       | Farmed land         |
| TA   | Taddert        | 31.3744       | 7.4108         | 1275       | Farmed land         |
| OZ   | Ouzoud         | 32.0000       | 6.0600         | 1495       | Isolated population |

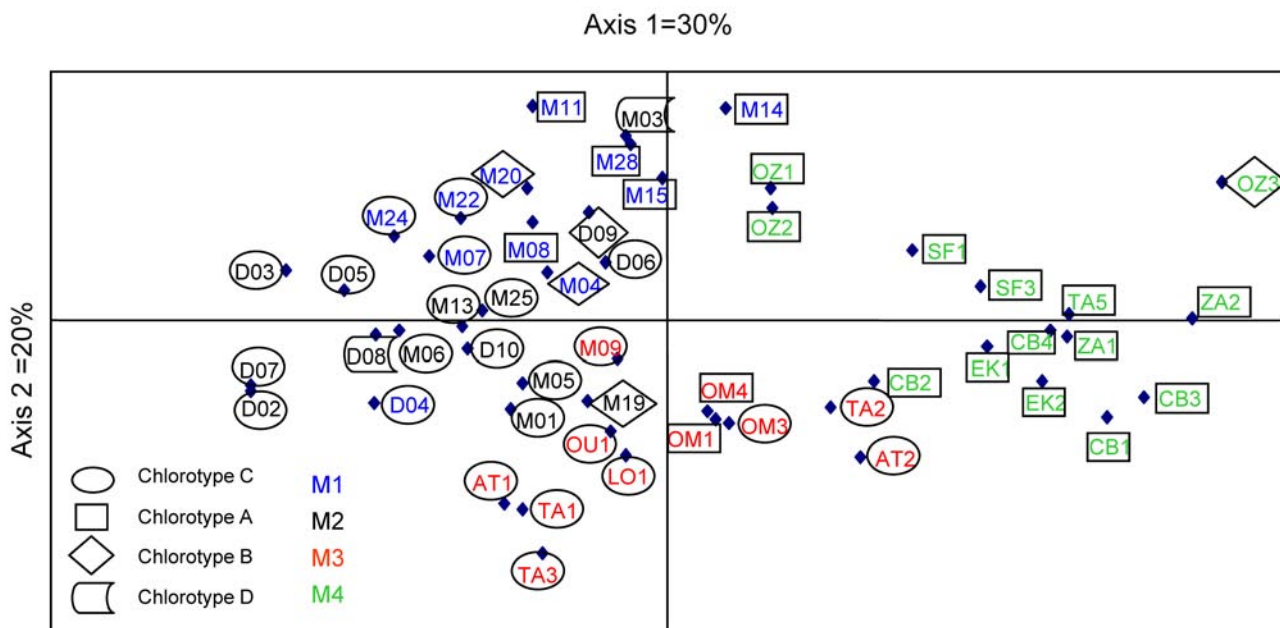

**Supplemental Figure 1** Principal component analysis visualizing genetic relationships among grapevine accessions. The first two components are plotted, explaining 30% (horizontal axis) and 20% (vertical axis) of the total variation, respectively.
